# Supplementary material
Source: MDPI journal article supplement (https://www.mdpi.com/2072-4292/14/6/1364)
Supplement: s1 [file s1]

## Supplementary materials Table S1

### Accuracy assessment for each county

Confusion matrices of correctly and incorrectly classified sites across each of the five-counties in the focal region. Table S1 in the manuscript presents the summed values across each of these counties. Values represent the number of 3 m radius circles where the majority of classified cells matches (grey diagonal) or does not match (off diagonal cells) the actual land cover as determined from visually inspecting NAIP and VBMP imagery. Dec forest is deciduous and mixed forest, and EG forest is evergreen forest.

#### Smyth County:

|            |            | Reference |           |        |            |           |       |         |      |        |                    |
|------------|------------|-----------|-----------|--------|------------|-----------|-------|---------|------|--------|--------------------|
|            |            | water     | developed | barren | dec forest | EG forest | shrub | pasture | nk+  | users% |                    |
| Prediction | water      | 20        | 3         | 2      | 1          | 0         | 0     | 1       | 27   | 0.74   |                    |
|            | developed  | 0         | 86        | 5      | 1          | 0         | 0     | 4       | 96   | 0.90   |                    |
|            | barren     | 0         | 11        | 67     | 0          | 0         | 0     | 1       | 79   | 0.85   |                    |
|            | dec forest | 0         | 0         | 0      | 88         | 9         | 2     | 0       | 99   | 0.89   |                    |
|            | EG forest  | 0         | 0         | 0      | 8          | 90        | 1     | 0       | 99   | 0.91   |                    |
|            | shrub      | 0         | 0         | 0      | 4          | 0         | 68    | 3       | 75   | 0.91   |                    |
|            | pasture    | 0         | 1         | 4      | 3          | 0         | 6     | 85      | 99   | 0.86   |                    |
|            |            |           |           |        |            |           |       |         |      |        |                    |
|            |            | n+k       | 20        | 101    | 78         | 105       | 99    | 77      | 94   |        | 574 n              |
|            |            | prod%     | 1.00      | 0.85   | 0.86       | 0.84      | 0.91  | 0.88    | 0.90 |        | 0.8780 overall Acc |

#### Tazewell County:

|            |            | Reference |           |        |            |           |       |         |      |        |                    |
|------------|------------|-----------|-----------|--------|------------|-----------|-------|---------|------|--------|--------------------|
|            |            | water     | developed | barren | dec forest | EG forest | shrub | pasture | nk+  | users% |                    |
| Prediction | water      | 16        | 0         | 0      | 0          | 0         | 0     | 0       | 16   | 1.00   |                    |
|            | developed  | 0         | 59        | 1      | 1          | 0         | 1     | 3       | 65   | 0.91   |                    |
|            | barren     | 0         | 3         | 54     | 1          | 0         | 3     | 6       | 67   | 0.81   |                    |
|            | dec forest | 0         | 0         | 1      | 55         | 2         | 1     | 2       | 61   | 0.90   |                    |
|            | EG forest  | 0         | 0         | 0      | 10         | 64        | 0     | 1       | 75   | 0.85   |                    |
|            | shrub      | 0         | 0         | 1      | 5          | 1         | 57    | 2       | 66   | 0.86   |                    |
|            | pasture    | 0         | 0         | 0      | 1          | 0         | 3     | 62      | 66   | 0.94   |                    |
|            |            |           |           |        |            |           |       |         |      |        |                    |
|            |            | n+k       | 16        | 62     | 57         | 73        | 67    | 65      | 76   |        | 416 n              |
|            |            | prod%     | 1.00      | 0.95   | 0.95       | 0.75      | 0.96  | 0.88    | 0.82 |        | 0.8822 overall Acc |

**Bland County:**

|            |            | Reference |           |        |            |           |       |         |      |        |                    |
|------------|------------|-----------|-----------|--------|------------|-----------|-------|---------|------|--------|--------------------|
|            |            | water     | developed | barren | dec forest | EG forest | shrub | pasture | nk+  | users% |                    |
| Prediction | water      | 19        | 0         | 0      | 1          | 0         | 1     | 0       | 21   | 0.90   |                    |
|            | developed  | 1         | 41        | 6      | 1          | 0         | 4     | 5       | 58   | 0.71   |                    |
|            | barren     | 0         | 3         | 77     | 1          | 0         | 3     | 7       | 91   | 0.85   |                    |
|            | dec forest | 0         | 0         | 1      | 95         | 4         | 0     | 0       | 100  | 0.95   |                    |
|            | EG forest  | 0         | 0         | 0      | 7          | 81        | 1     | 0       | 89   | 0.91   |                    |
|            | shrub      | 0         | 0         | 1      | 0          | 0         | 54    | 2       | 57   | 0.95   |                    |
|            | pasture    | 0         | 0         | 0      | 0          | 0         | 0     | 100     | 100  | 1.00   |                    |
|            |            |           |           |        |            |           |       |         |      |        |                    |
|            |            | n+k       | 20        | 44     | 85         | 105       | 85    | 63      | 114  |        | 516 n              |
|            |            | prod%     | 0.95      | 0.93   | 0.91       | 0.90      | 0.95  | 0.86    | 0.88 |        | 0.9050 overall Acc |

**Russell County:**

|            |            | Reference |           |        |            |           |       |         |      |        |                    |
|------------|------------|-----------|-----------|--------|------------|-----------|-------|---------|------|--------|--------------------|
|            |            | water     | developed | barren | dec forest | EG forest | shrub | pasture | nk+  | users% |                    |
| Prediction | water      | 44        | 4         | 0      | 0          | 0         | 0     | 0       | 48   | 0.92   |                    |
|            | developed  | 1         | 83        | 3      | 0          | 0         | 2     | 0       | 89   | 0.93   |                    |
|            | barren     | 0         | 2         | 70     | 0          | 0         | 0     | 9       | 81   | 0.86   |                    |
|            | dec forest | 0         | 0         | 0      | 99         | 0         | 0     | 0       | 99   | 1.00   |                    |
|            | EG forest  | 0         | 0         | 0      | 29         | 66        | 2     | 0       | 97   | 0.68   |                    |
|            | shrub      | 0         | 1         | 0      | 0          | 0         | 87    | 1       | 89   | 0.98   |                    |
|            | pasture    | 0         | 0         | 1      | 0          | 0         | 0     | 97      | 98   | 0.99   |                    |
|            |            |           |           |        |            |           |       |         |      |        |                    |
|            |            | n+k       | 45        | 90     | 74         | 128       | 66    | 91      | 107  |        | 601 n              |
|            |            | prod%     | 0.98      | 0.92   | 0.95       | 0.77      | 1.00  | 0.96    | 0.91 |        | 0.9085 overall Acc |

**Washington County (only NAIP imagery/no VBMP):**

|            |            | Reference |           |        |            |           |       |         |      |        |                    |
|------------|------------|-----------|-----------|--------|------------|-----------|-------|---------|------|--------|--------------------|
|            |            | water     | developed | barren | dec forest | EG forest | shrub | pasture | nk+  | users% |                    |
| Prediction | water      | 62        | 7         | 1      | 1          | 0         | 0     | 1       | 72   | 0.86   |                    |
|            | developed  | 0         | 98        | 1      | 0          | 0         | 2     | 0       | 101  | 0.97   |                    |
|            | barren     | 0         | 14        | 71     | 1          | 0         | 1     | 9       | 96   | 0.74   |                    |
|            | dec forest | 0         | 0         | 0      | 96         | 4         | 0     | 0       | 100  | 0.96   |                    |
|            | EG forest  | 0         | 0         | 0      | 23         | 65        | 1     | 0       | 89   | 0.73   |                    |
|            | shrub      | 0         | 1         | 0      | 0          | 1         | 60    | 3       | 65   | 0.92   |                    |
|            | pasture    | 0         | 1         | 1      | 0          | 0         | 2     | 96      | 100  | 0.96   |                    |
|            |            |           |           |        |            |           |       |         |      |        |                    |
|            |            | n+k       | 62        | 121    | 74         | 121       | 70    | 66      | 109  |        | 623 n              |
|            |            | prod%     | 1.00      | 0.81   | 0.96       | 0.79      | 0.93  | 0.91    | 0.88 |        | 0.8796 overall Acc |
